# Supplementary material
Source: publisher figshare collection journal article supplement (https://tandf.figshare.com/ndownloader/files/1717973)
Supplement: Supplementary file 1 [file 1717973]

Supplemental Table 1. Numbers of collected moth larvae and of wasps emerged from the larvae on *Juglans mandshurica*, *Platycarya strobilacea* and *Lyonia ovalifolia* in each sampling locality are shown.

| Host plant | | | Parasitoid wasp | | | | | | | | | | | | | | | | | | | Total | Number of moth larvae collected |
| --- | --- | --- | --- | --- | --- | --- | --- | --- | --- | --- | --- | --- | --- | --- | --- | --- | --- | --- | --- | --- | --- | --- | --- |
| Family | Species | Locality | Braconidae | | | Eulophidae | | | | | | | | | | | | | Pteromalidae | | |
| *An. p.* | *C.* sp. | *Ph.* sp. | sp. 1 | sp. 2 | sp. 3 | sp. 4 | sp. 5 | sp. 6 | sp. 7 | sp. 8 | sp. 9 | sp. 10 | sp. 11 | sp. 12 | sp. 13 | sp. 1 | sp. 2 | sp. 3 |
| Juglandaceae | *J. m.* | Yamadera | 14 | 0 | 0 | 0 | 0 | 0 | 0 | 0 | 0 | 0 | 0 | 0 | 0 | 0 | 0 | 0 | 0 | 0 | 0 | 14 | 22 |
| Sendai | 41 | 0 | 1 | 0 | 0 | 0 | 0 | 0 | 0 | 0 | 0 | 0 | 0 | 0 | 0 | 0 | 1 | 0 | 0 | 43 | 309 |
| Kaida | 29 | 0 | 0 | 1 | 0 | 0 | 0 | 0 | 0 | 0 | 0 | 0 | 0 | 0 | 0 | 0 | 0 | 0 | 0 | 30 | 83 |
| Niimi | 142 | 3 | 0 | 1 | 0 | 0 | 2 | 0 | 0 | 0 | 0 | 0 | 0 | 2 | 0 | 2 | 0 | 0 | 0 | 152 | 378 |
| *Pl. s.* | Niimi | 36 | 61 | 0 | 11 | 0 | 0 | 0 | 0 | 0 | 0 | 0 | 0 | 0 | 2 | 1 | 0 | 0 | 15 | 1 | 127 | 500 |
| Ericaceae | *L. o.* | Sendai | 0 | 0 | 0 | 4 | 0 | 0 | 0 | 0 | 0 | 0 | 0 | 0 | 2 | 0 | 0 | 0 | 0 | 0 | 0 | 6 | 232 |
| Kaida | 2 | 0 | 0 | 1 | 0 | 0 | 0 | 0 | 0 | 0 | 0 | 0 | 0 | 0 | 0 | 0 | 0 | 0 | 0 | 3 | 29 |
| Niimi | 0 | 15 | 0 | 11 | 0 | 8 | 8 | 0 | 1 | 4 | 1 | 3 | 0 | 0 | 0 | 0 | 0 | 0 | 0 | 51 | 368 |
| Kirishima | 4 | 0 | 78 | 1 | 1 | 1 | 4 | 1 | 0 | 0 | 0 | 0 | 0 | 0 | 0 | 0 | 0 | 0 | 0 | 90 | 302 |
| Total | | | 268 | 79 | 79 | 30 | 1 | 9 | 14 | 1 | 1 | 4 | 1 | 3 | 2 | 4 | 1 | 2 | 1 | 15 | 1 | 516 | 2223 |

*J. m., Juglans mandshurica; Pl. s, Platycarya strobilacea; L. o., Lyonia ovalifolia; An. p., Aneurobracon philippinensis; C. sp., Choeras sp.; Ph. sp., Pholetesor sp.*
